# Supplementary material for: Assembling strategy to synthesize palladium modified kaolin nanocomposites with different morphologies
Source: PubMed Central journal article supplement (PMC4558717; doi:10.1038/srep13763), 2015-09-03
Supplement: srep13763-s1.pdf [file srep13763-s1.pdf]

# Supporting Information

## Assembling strategy to synthesize palladium modified kaolin nanocomposites with different morphologies

Xiaoyu Li, Jing Ouyang, Yonghua Zhou, Huaming Yang\*

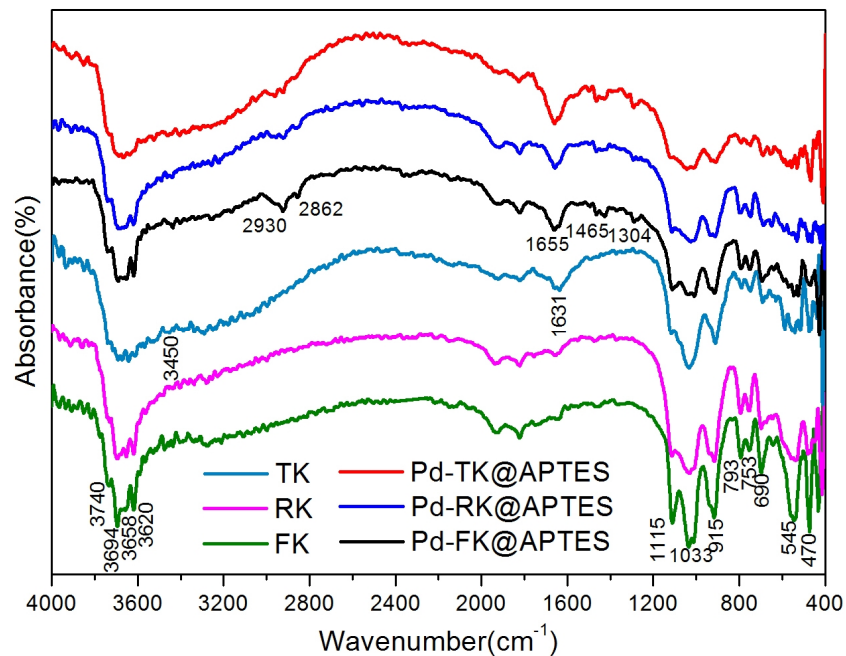

**Figure S1.** FTIR spectra of kaolins with different morphologies and Pd-kaolins@APTES.

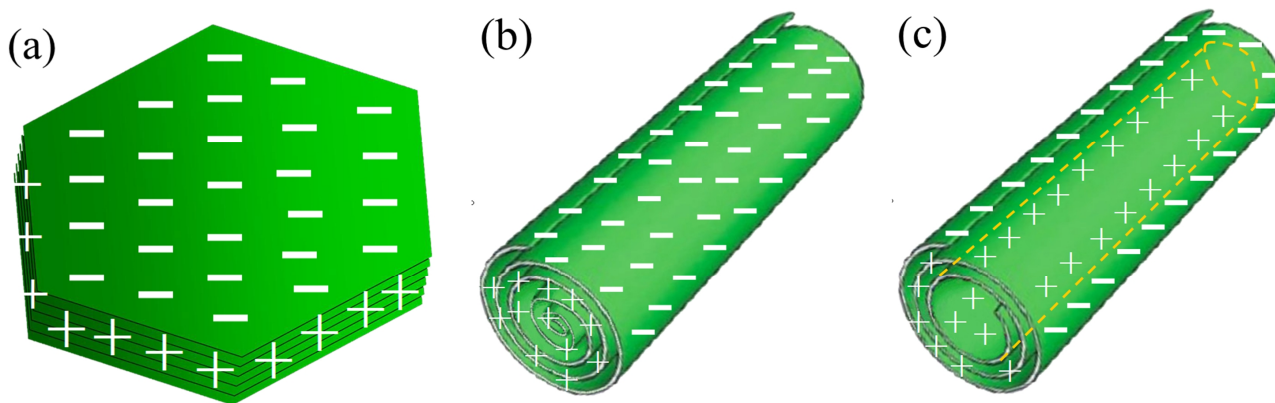

**Figure S2.** Schematic view of surface charge distributions of kaolins with different morphologies (a) flake-like, (b) rod-like, (c) tube-like.

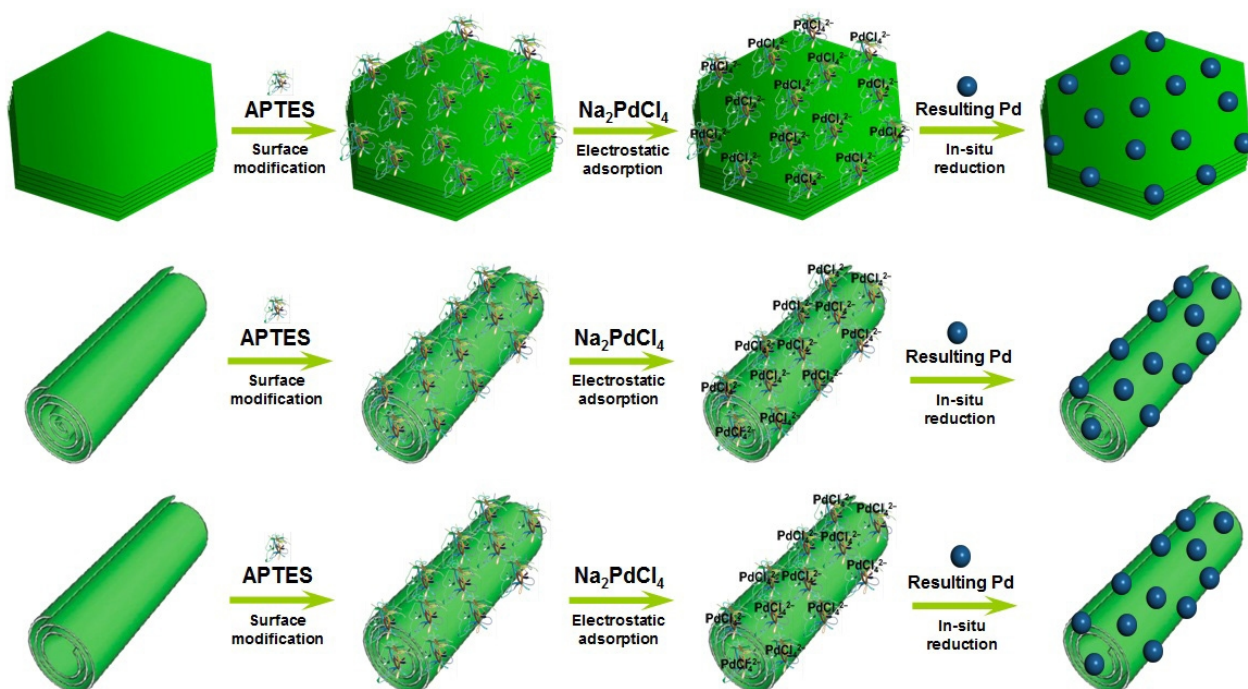

**Figure S3.** Schematic view of the process of anchoring Pd nanoparticles on kaolins with different morphologies.

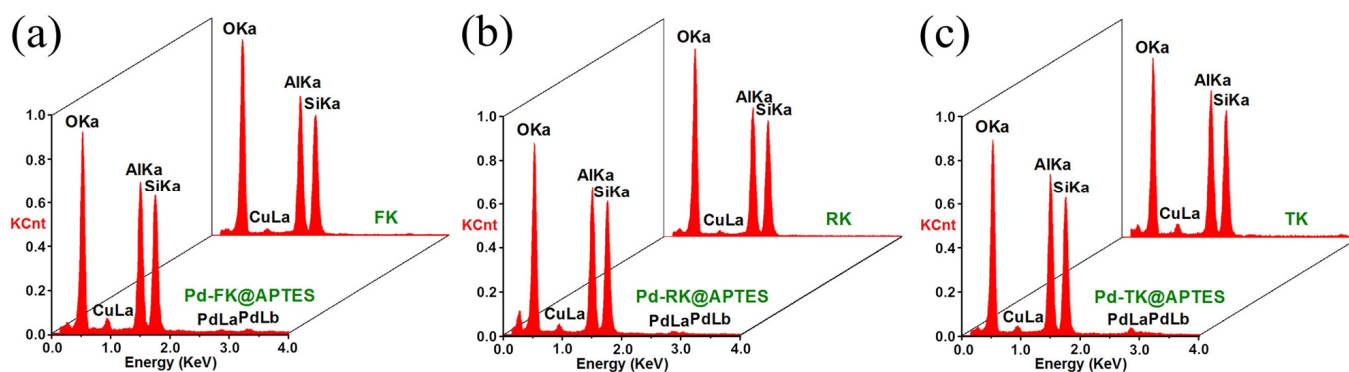

**Figure S4.** EDS spectra of (a) FK and Pd-FK@APTES, (b) RK and Pd-RK@APTES, (c) TK and Pd-TK@APTES.

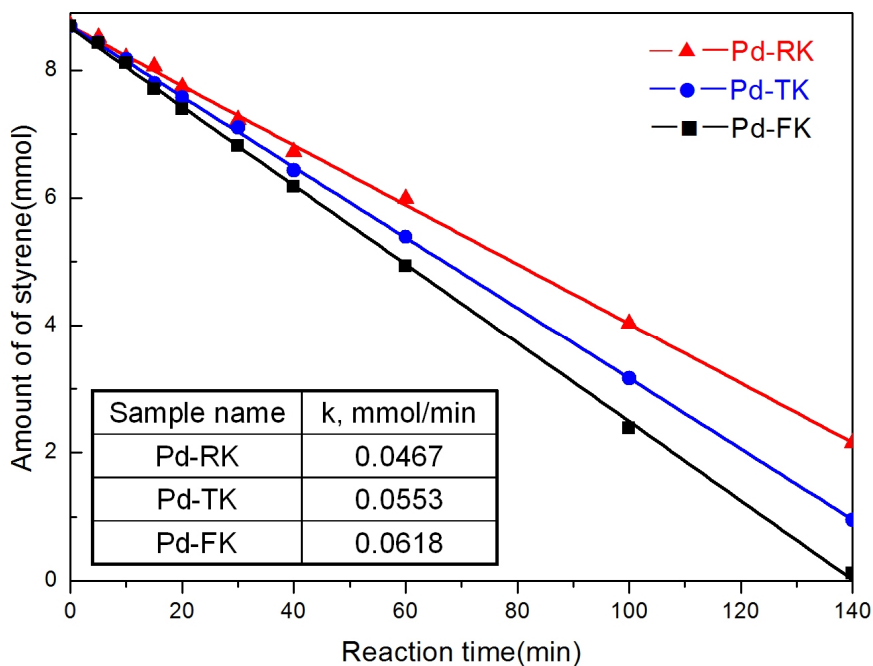

**Figure S5.** Styrene hydrogenation reaction curves of Pd-RK, Pd-TK and Pd-FK.
